# Supplementary material for: High level of pre-treatment C-reactive protein to albumin ratio predicts inferior prognosis in diffuse large B-cell lymphoma
Source: PubMed Central journal article supplement (PMC7846592; doi:10.1038/s41598-021-82087-6), 2021-01-29
Supplement: 41598_2021_82087_MOESM1_ESM.pdf [file 41598_2021_82087_MOESM1_ESM.pdf]

# High Level of Pre-treatment C-reactive Protein to Albumin Ratio Predicts Inferior Prognosis in Diffuse Large B-cell Lymphoma

Jongheon Jung, Hyewon Lee, Ja Yoon Heo, Myung Hee Chang, Eunyoung Lee, Weon Seo Park, Ju-Hyun Park, Hyeon-Seok Eom

## SUPPLEMENTARY INFORMATION

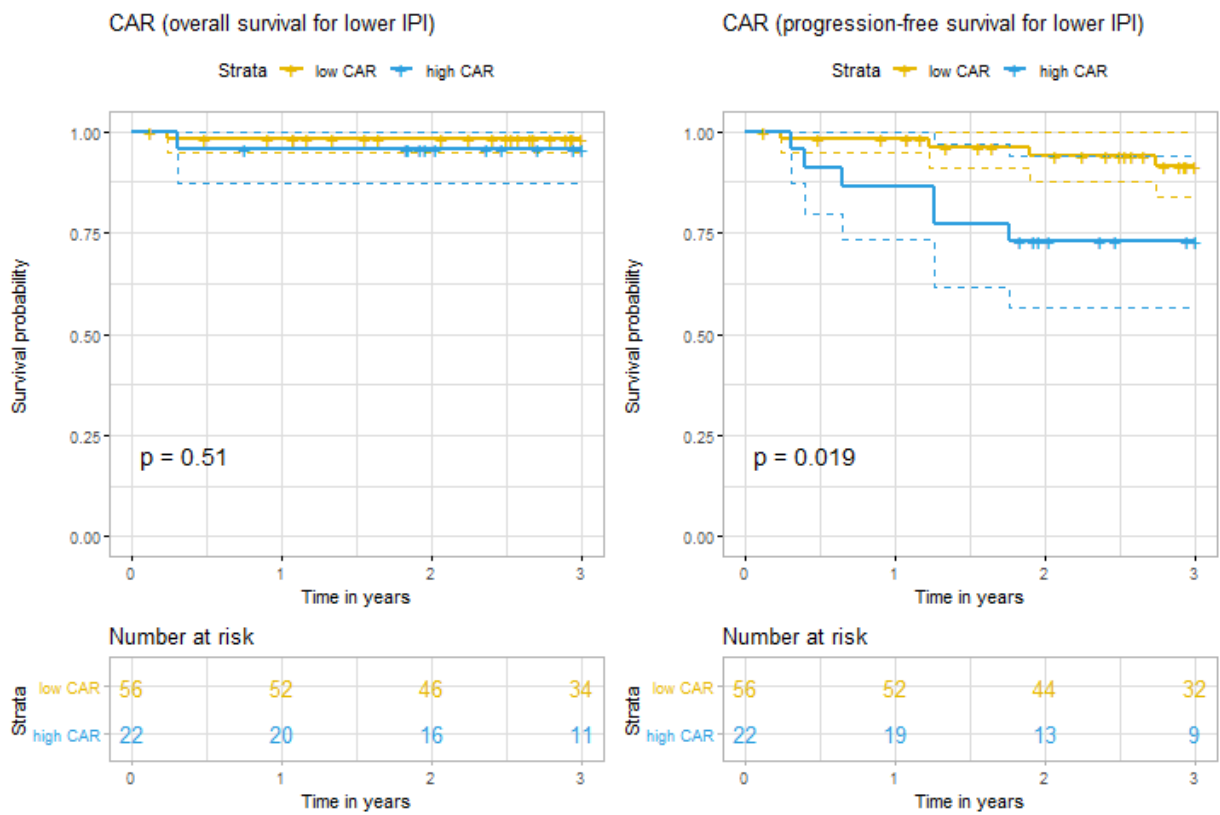

**Figure S-1.** Kaplan–Meier curves for overall survival and progression-free survival according to the C-reactive protein-to-albumin ratio (CAR) at the diagnosis of diffuse large B-cell lymphoma in patients with lower International Prognostic Index (0–2).

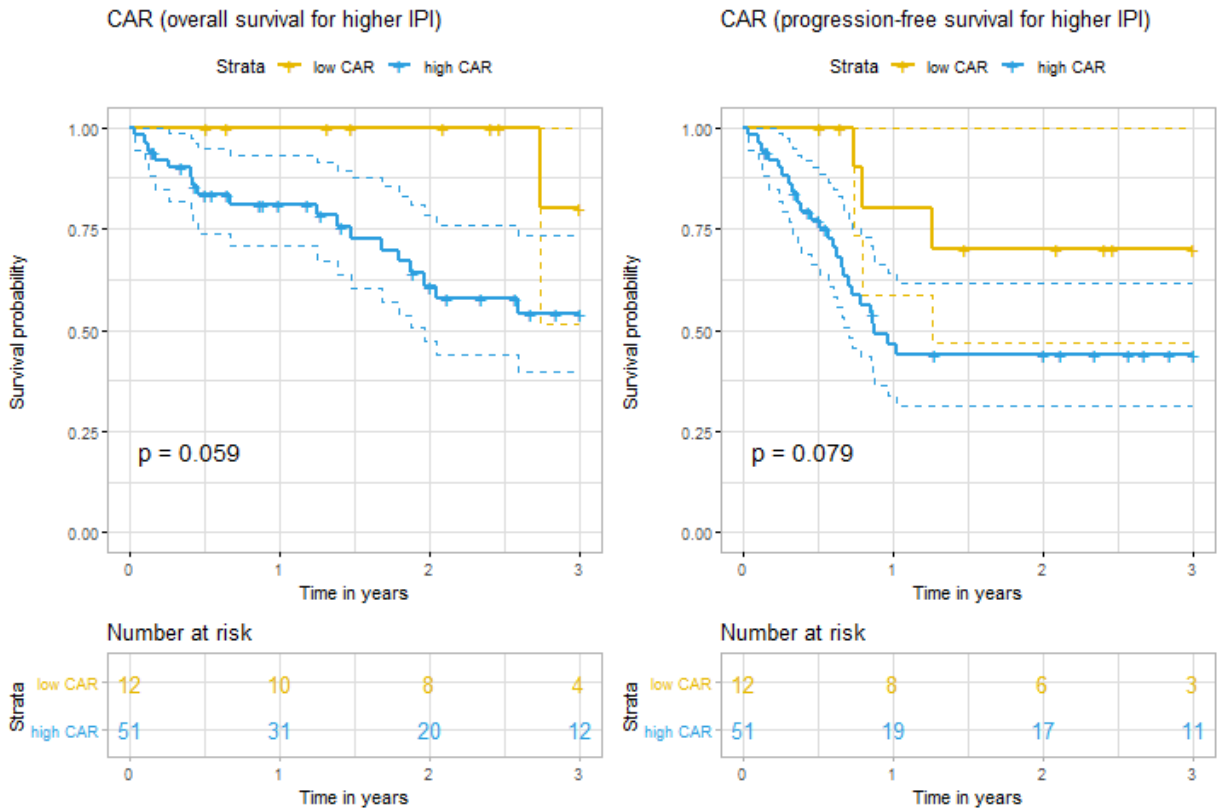

**Figure S-2.** Kaplan–Meier curves for overall survival and progression-free survival according to the C-reactive protein-to-albumin ratio (CAR) at the diagnosis of diffuse large B-cell lymphoma in patients with higher International Prognostic Index (3–5).

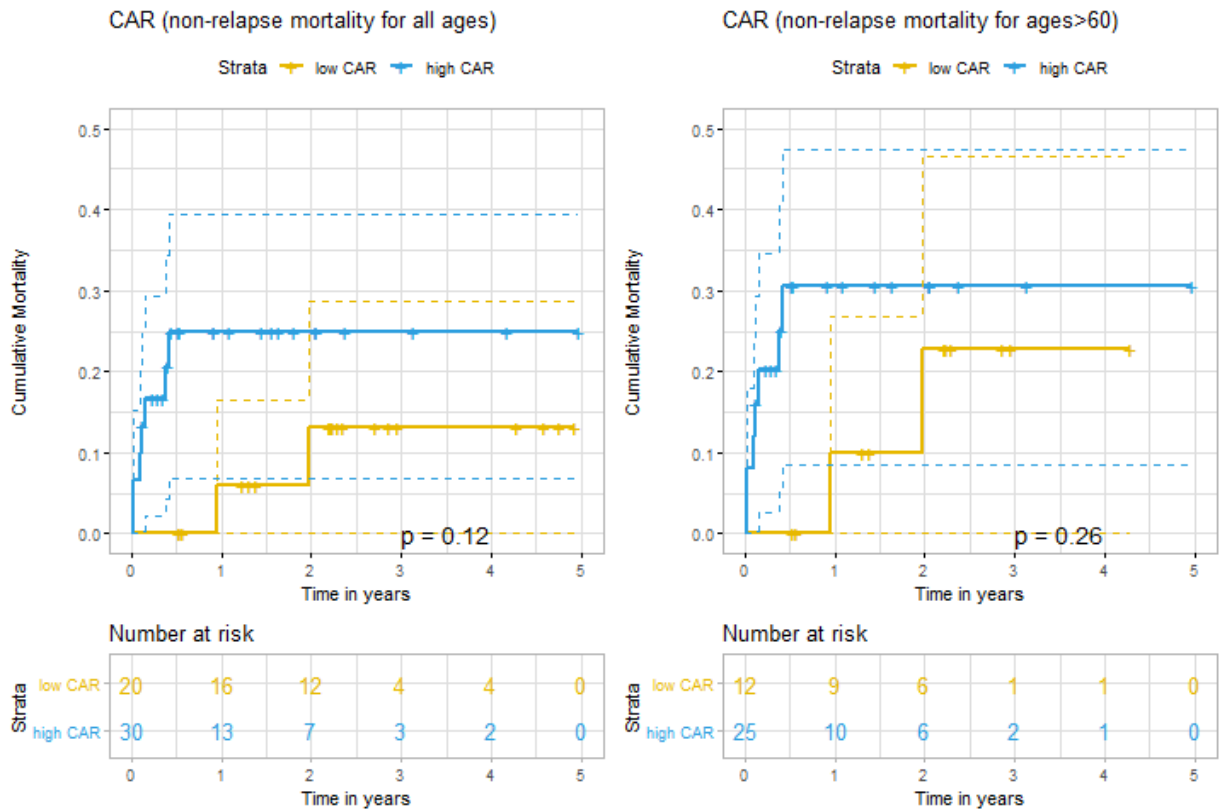

**Figure S-3.** Kaplan–Meier curves for non-relapse mortality according to the C-reactive protein-to-albumin ratio (CAR) at the diagnosis of diffuse large B-cell lymphoma in the validation cohort.

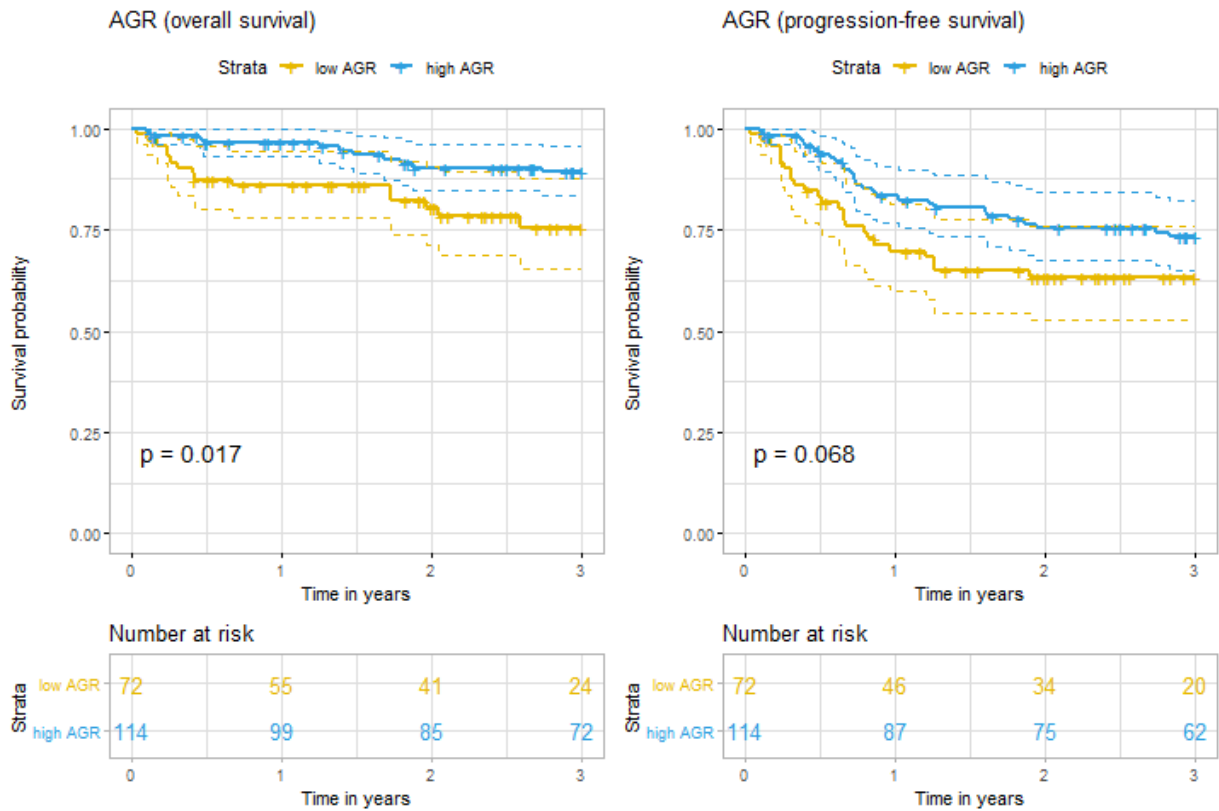

**Figure S-4.** Kaplan–Meier curves for overall survival and progression-free survival according to the albumin-to-globulin ratio (AGR) at the diagnosis of diffuse large B-cell lymphoma.

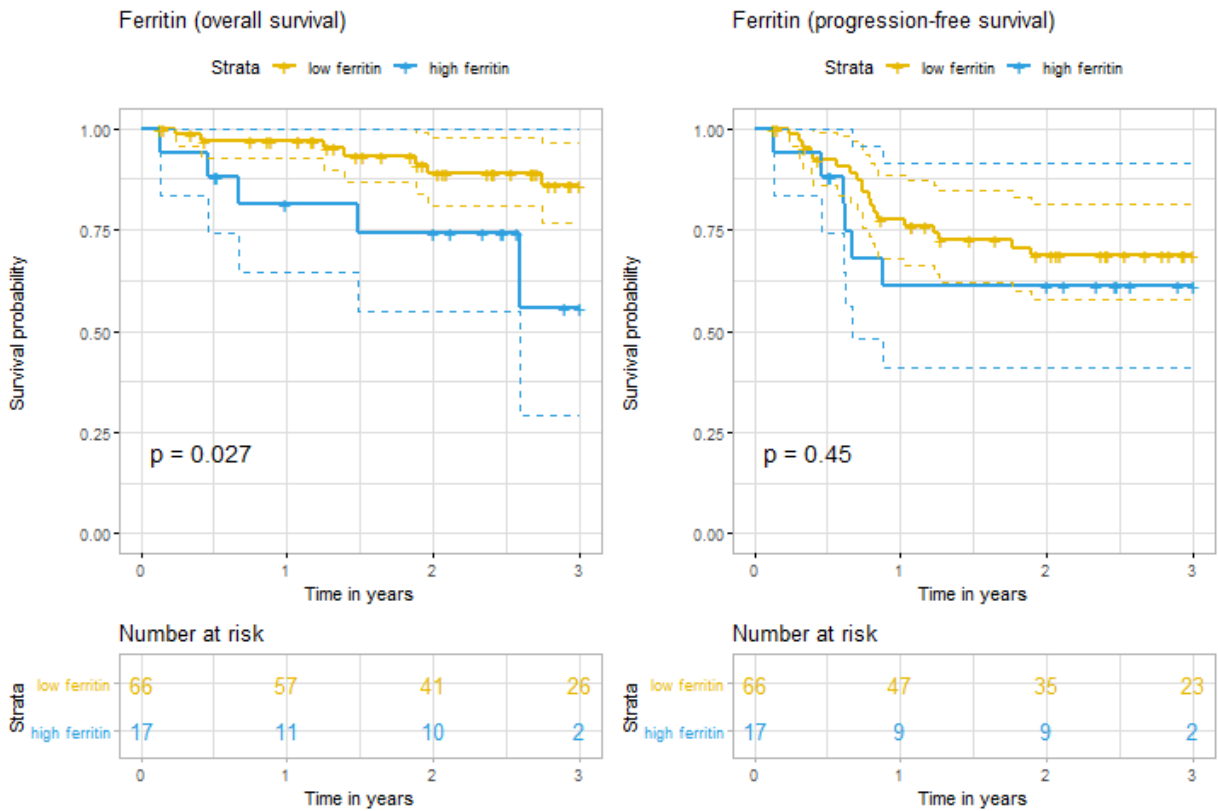

**Figure S-5.** Kaplan–Meier curves for overall survival and progression-free survival according to serum ferritin levels at the diagnosis of diffuse large B-cell lymphoma.

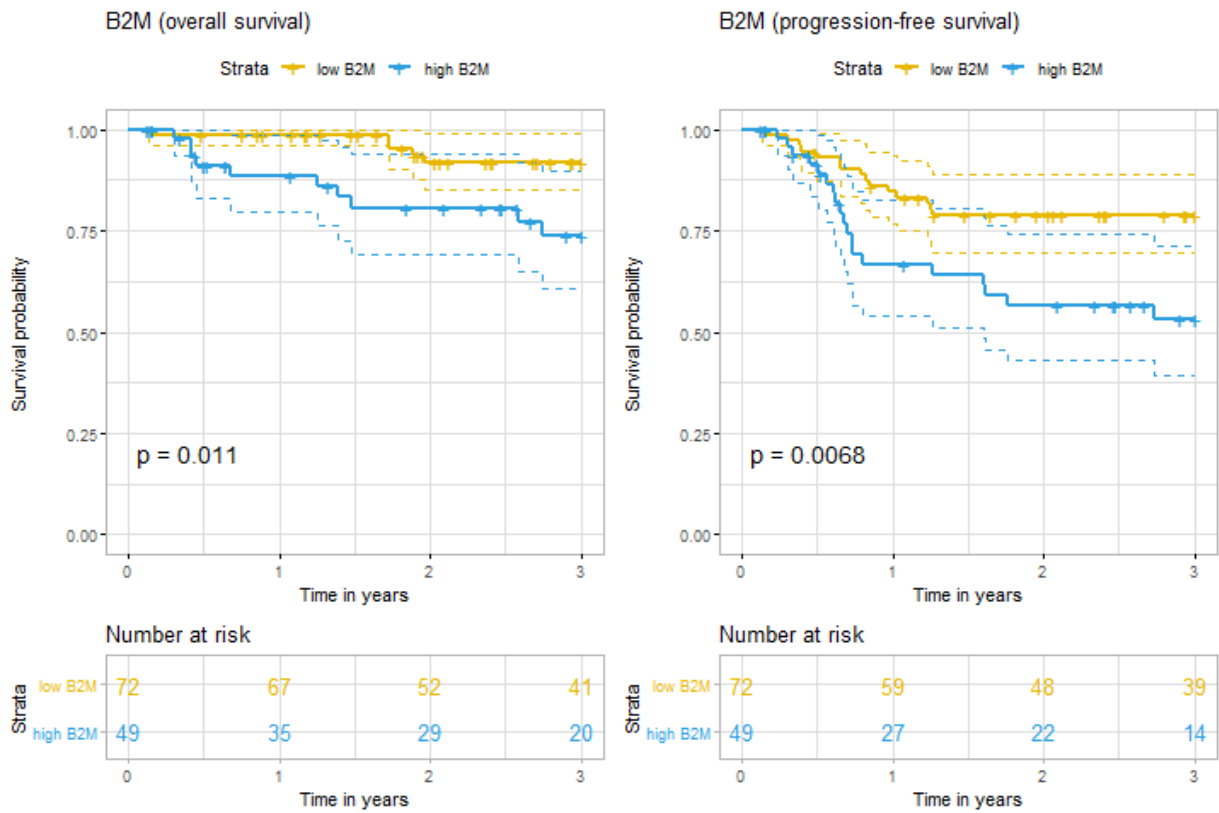

**Figure S-6.** Kaplan–Meier curves for overall survival and progression-free survival according to serum beta 2 microglobulin (B2M) levels at the diagnosis of diffuse large B-cell lymphoma.

**Table S-1. Clinical characteristics of patients in validation cohort**

|                              | <b>Total</b>     | <b>Low CAR<br/>(≤0.158)</b> | <b>High CAR<br/>(&gt;0.158)</b> | <b>P*</b>        | <b>P†</b>    |
|------------------------------|------------------|-----------------------------|---------------------------------|------------------|--------------|
| <b>Number</b>                | 50               | 20 (40.0%)                  | 30 (60.0%)                      |                  |              |
| <b>Male sex</b>              | 26 (52.0%)       | 9 (45.0%)                   | 17 (56.7%)                      | 0.419            | 0.611        |
| <b>Age &gt;60 years</b>      | 37 (74.0%)       | 12 (60.0%)                  | 25 (83.3%)                      | 0.065            | 0.129        |
| <b>Stage &gt;2</b>           | 28 (56.0%)       | 7 (35.0%)                   | 21 (75.0%)                      | <b>0.015</b>     | 0.750        |
| <b>ECOG PS &gt;1</b>         | 22 (44.0%)       | 3 (15.0%)                   | 19 (63.3%)                      | <b>0.001</b>     | 0.627        |
| <b>LDH &gt;UNL</b>           | 22 (44.0%)       | 5 (25.0%)                   | 17 (56.7%)                      | <b>0.027</b>     | 0.079        |
| <b>Extranodal &gt;1</b>      | 18 (36.0%)       | 5 (25.0%)                   | 13 (43.3%)                      | 0.186            | 0.430        |
| <b>IPI</b>                   |                  |                             |                                 | <b>0.037</b>     | 0.183        |
| <b>0</b>                     | 5 (10.0%)        | 4 (20.0%)                   | 1 (3.3%)                        |                  |              |
| <b>1</b>                     | 10 (20.0%)       | 6 (30.0%)                   | 4 (13.3%)                       |                  |              |
| <b>2</b>                     | 9 (18.0%)        | 5 (25.0%)                   | 4 (13.3%)                       |                  |              |
| <b>3</b>                     | 9 (18.0%)        | 2 (10.0%)                   | 7 (23.3%)                       |                  |              |
| <b>4</b>                     | 11 (22.0%)       | 3 (15.0%)                   | 8 (26.7%)                       |                  |              |
| <b>5</b>                     | 6 (12.0%)        | 0 (0%)                      | 6 (20.0%)                       |                  |              |
| <b>Non-GCB type</b>          | 47 (94.0%)       | 19 (95.0%)                  | 28 (93.3%)                      | 1.000            | 0.428        |
| <b>Cycles of R-CHOP</b>      | 6 [1-8]          | 6 [4-6]                     | 6 [1-8]                         | 0.090            | 0.288        |
| <b>Response to induction</b> |                  |                             |                                 |                  |              |
| <b>CR</b>                    | 35 (70.0%)       | 17 (85.0%)                  | 18 (60.0%)                      | 0.180            | <b>0.031</b> |
| <b>PR</b>                    | 6 (12.0%)        | 2 (10.0%)                   | 4 (13.3%)                       |                  |              |
| <b>SD</b>                    | 0 (0%)           | 0 (0%)                      | 0 (0%)                          |                  |              |
| <b>PD</b>                    | 4 (8.0%)         | 1 (5.0%)                    | 3 (10.0%)                       |                  |              |
| <b>Not available</b>         | 5 (10.0%)        | 0 (0%)                      | 5 (16.7%)                       |                  |              |
| <b>Overall response</b>      | 41 (91.1%)       | 19 (95.0%)                  | 22 (88.0%)                      | 0.617            | 0.082        |
| <b>CRP (mg/dL)</b>           | 1.46 [0.20-9.91] | 0.50 [0.20-0.66]            | 3.69 [0.50-9.91]                | <b>&lt;0.001</b> | 0.999        |
| <b>Albumin (g/dL)</b>        | 3.7 [1.9-4.7]    | 4.2 [3.5-4.7]               | 3.5 [1.9-4.1]                   | <b>&lt;0.001</b> | 0.999        |

Data are presented as number of patients (frequency) for categorical variables and as median [range] for continuous variables.

\*High-CAR group vs. low-CAR group. †compared between the original cohort and validation cohort

CAR, C-reactive protein-to-albumin ratio; ECOG PS, Eastern Cooperative Oncology Group performance status; LDH, lactate dehydrogenase; UNL, upper normal limit; IPI, International Prognostic Index; GCB, germinal centre B-cell; R-CHOP, rituximab, cyclophosphamide, doxorubicin, vincristine, and prednisone; CR, complete response; PR, partial response; SD, stable disease; PD, progressive disease

**Table S-2. Univariable and multivariable analyses of overall survival and progression-free survival in validation cohort**

|                 | Univariable OS  |              |              | Multivariable OS  |              |              |
|-----------------|-----------------|--------------|--------------|-------------------|--------------|--------------|
|                 | HR              | (95% CI)     | <i>p</i>     | HR                | (95% CI)     | <i>p</i>     |
| Age >60 years*  | NA              | NA           | NA           | NA                | NA           | NA           |
| Stage (III, IV) | 2.95            | (0.95–9.18)  | 0.062        | 0.86              | (0.18–4.21)  | 0.855        |
| LDH >UNL        | 2.04            | (0.58–7.17)  | 0.266        | 1.58              | (0.26–9.53)  | 0.617        |
| ECOG PS >1      | 2.89            | (1.04–8.00)  | <b>0.041</b> | 0.70              | (0.16–3.01)  | 0.628        |
| EN >1           | 3.28            | (1.19–9.03)  | <b>0.022</b> | 2.16              | (0.47–9.97)  | 0.323        |
| CAR >0.158      | 6.81            | (1.54–30.11) | <b>0.011</b> | 6.13              | (1.06–35.34) | <b>0.042</b> |
|                 | Univariable PFS |              |              | Multivariable PFS |              |              |
|                 | HR              | (95% CI)     | <i>p</i>     | HR                | (95% CI)     | <i>p</i>     |
| Age >60 years   | 4.28            | (0.99–18.49) | 0.051        | 2.66              | (0.57–12.53) | 0.215        |
| Stage (III, IV) | 3.22            | (1.16–8.90)  | <b>0.024</b> | 1.08              | (0.27–4.26)  | 0.911        |
| LDH >UNL        | 2.78            | (0.81–9.51)  | 0.103        | 1.61              | (0.32–8.13)  | 0.562        |
| ECOG PS >1      | 3.60            | (1.42–9.11)  | <b>0.007</b> | 0.97              | (0.26–3.56)  | 0.959        |
| EN >1           | 3.29            | (1.34–8.06)  | <b>0.009</b> | 1.96              | (0.54–7.12)  | 0.306        |
| CAR >0.158      | 6.07            | (1.77–20.85) | <b>0.004</b> | 4.66              | (1.09–19.93) | <b>0.038</b> |

OS, overall survival; PFS, progression-free survival; HR, hazard ratio; CI, confidence interval; UNL, upper normal limit; ECOG PS, Eastern Cooperative Oncology Group performance status; EN, extranodal; CAR, C-reactive protein-to-albumin ratio

\*no death in patients ≤60 years



**Table S-3. Univariable and multivariable analyses of overall survival and progression-free survival in patients with available pre-treatment albumin-to-globulin ratio data**

|                 | Univariable OS |                |              | Multivariable OS |              |              |
|-----------------|----------------|----------------|--------------|------------------|--------------|--------------|
|                 | HR             | (95% CI)       | <i>p</i>     | HR               | (95% CI)     | <i>p</i>     |
| Age >60 years   | 1.90           | (0.85–4.28)    | 0.118        | 1.60             | (0.70–3.65)  | 0.261        |
| Stage (III, IV) | 3.86           | (1.46–10.25)   | <b>0.007</b> | 1.99             | (0.66–5.95)  | 0.221        |
| LDH >UNL        | 8.90           | (2.10–37.69)   | <b>0.003</b> | 5.65             | (1.27–25.22) | <b>0.023</b> |
| ECOG PS >1      | 3.72           | (1.56787–8.87) | <b>0.003</b> | 2.09             | (0.85–5.18)  | 0.109        |
| EN >1           | 2.43           | (1.12–5.25)    | <b>0.024</b> | 1.09             | (0.46–2.60)  | 0.848        |
| AGR >1.381      | 0.40           | (0.18–0.87)    | <b>0.022</b> | 0.68             | (0.30–1.51)  | 0.338        |

  

|                 | Univariable PFS |              |                  | Multivariable PFS |             |              |
|-----------------|-----------------|--------------|------------------|-------------------|-------------|--------------|
|                 | HR              | (95% CI)     | <i>p</i>         | HR                | (95% CI)    | <i>p</i>     |
| Age >60 years   | 2.15            | (1.20–3.82)  | <b>0.010</b>     | 1.83              | (1.01–3.31) | <b>0.046</b> |
| Stage (III, IV) | 5.03            | (2.45–10.32) | <b>&lt;0.001</b> | 3.57              | (1.62–7.87) | <b>0.002</b> |
| LDH >UNL        | 2.91            | (1.50–5.66)  | <b>0.002</b>     | 1.76              | (0.86–3.58) | 0.121        |
| ECOG PS >1      | 3.04            | (1.56–5.91)  | <b>0.001</b>     | 1.72              | (0.86–3.43) | 0.124        |
| EN >1           | 2.39            | (1.39–4.09)  | <b>0.002</b>     | 1.12              | (0.62–2.02) | 0.715        |
| AGR >1.381      | 0.61            | (0.35–1.04)  | 0.071            | 0.95              | (0.54–1.68) | 0.869        |

OS, overall survival; PFS, progression-free survival; HR, hazard ratio; CI, confidence interval; UNL, upper normal limit; ECOG PS, Eastern Cooperative Oncology Group performance status; EN, extranodal; AGR, albumin-to-globulin ratio

**Table S-4. Univariable and multivariable analyses of overall survival and progression-free survival in patients with available pre-treatment serum ferritin levels**

|                     | Univariable OS |              |              | Multivariable OS |              |              |
|---------------------|----------------|--------------|--------------|------------------|--------------|--------------|
|                     | HR             | (95% CI)     | <i>p</i>     | HR               | (95% CI)     | <i>p</i>     |
| Age >60 years       | 4.50           | (1.21–16.79) | <b>0.025</b> | 4.64             | (1.12–19.18) | <b>0.034</b> |
| Stage (III, IV)     | 4.51           | (0.98–20.67) | 0.053        | 3.37             | (0.66–17.16) | 0.143        |
| LDH >UNL            | 5.69           | (0.73–44.15) | 0.096        | 2.94             | (0.34–25.05) | 0.325        |
| ECOG PS >1          | 2.13           | (0.58–7.86)  | 0.258        | 0.69             | (0.15–3.24)  | 0.640        |
| EN >1               | 1.26           | (0.40–3.99)  | 0.693        | 0.67             | (0.19–2.27)  | 0.516        |
| Ferritin >319 ng/mL | 3.41           | (1.07–10.89) | <b>0.038</b> | 2.58             | (0.67–10.00) | 0.169        |

  

|                     | Univariable PFS |             |              | Multivariable PFS |             |              |
|---------------------|-----------------|-------------|--------------|-------------------|-------------|--------------|
|                     | HR              | (95% CI)    | <i>p</i>     | HR                | (95% CI)    | <i>p</i>     |
| Age >60 years       | 2.89            | (1.24–6.73) | <b>0.014</b> | 2.62              | (1.08–6.32) | 0.032        |
| Stage (III, IV)     | 3.65            | (1.37–9.75) | <b>0.010</b> | 3.34              | (1.18–9.48) | <b>0.024</b> |
| LDH >UNL            | 2.78            | (0.95–8.10) | <b>0.062</b> | 2.07              | (0.67–6.41) | 0.207        |
| ECOG PS >1          | 1.38            | (0.47–4.02) | 0.556        | 0.68              | (0.21–2.24) | 0.528        |
| EN >1               | 1.44            | (0.65–3.17) | 0.369        | 1.00              | (0.41–2.41) | 0.997        |
| Ferritin >319 ng/mL | 1.42            | (0.57–3.57) | 0.451        | 0.91              | (0.33–2.53) | 0.853        |

OS, overall survival; PFS, progression-free survival; HR, hazard ratio; CI, confidence interval; LDH, lactate dehydrogenase; UNL, upper normal limit; ECOG PS, Eastern Cooperative Oncology Group performance status; EN, extranodal.

**Table S-5. Univariable and multivariable analyses of overall survival and progression-free survival in patients with available pre-treatment serum beta 2 microglobulin levels**

|                 | Univariable OS |              |              | Multivariable OS |             |          |
|-----------------|----------------|--------------|--------------|------------------|-------------|----------|
|                 | HR             | (95% CI)     | <i>p</i>     | HR               | (95% CI)    | <i>p</i> |
| Age >60 years   | 1.90           | (0.67–5.34)  | 0.225        | 1.74             | (0.58–5.26) | 0.323    |
| Stage (III, IV) | 2.80           | (0.89–8.82)  | 0.078        | 1.42             | (0.39–5.21) | 0.597    |
| LDH >UNL*       | NA             | NA           | NA           | NA               | NA          | NA       |
| ECOG PS >1      | 2.20           | (0.62–7.82)  | 0.221        | 1.00             | (0.26–3.92) | 0.996    |
| EN >1           | 1.56           | (0.55–4.39)  | 0.399        | 0.67             | (0.21–2.10) | 0.487    |
| B2M >3.09 mg/L  | 3.66           | (1.25–10.71) | <b>0.018</b> | 2.10             | (0.66–6.72) | 0.211    |

  

|                 | Univariable PFS |             |              | Multivariable PFS |             |              |
|-----------------|-----------------|-------------|--------------|-------------------|-------------|--------------|
|                 | HR              | (95% CI)    | <i>p</i>     | HR                | (95% CI)    | <i>p</i>     |
| Age >60 years   | 1.98            | (0.99–3.97) | 0.053        | 1.73              | (0.83–3.61) | 0.144        |
| Stage (III, IV) | 3.57            | (1.61–7.89) | <b>0.002</b> | 2.45              | (1.01–5.95) | <b>0.048</b> |
| LDH >UNL        | 3.61            | (1.49–8.74) | <b>0.004</b> | 2.56              | (1.02–6.46) | <b>0.046</b> |
| ECOG PS >1      | 2.56            | (1.12–5.90) | <b>0.027</b> | 1.31              | (0.53–3.25) | 0.555        |
| EN >1           | 1.77            | (0.89–3.50) | 0.103        | 0.89              | (0.42–1.89) | 0.770        |
| B2M >3.09 mg/L  | 2.48            | (1.26–4.88) | <b>0.009</b> | 1.34              | (0.63–2.86) | 0.443        |

OS, overall survival; PFS, progression-free survival; HR, hazard ratio; CI, confidence interval; LDH, lactate dehydrogenase; UNL, upper normal limit; ECOG PS, Eastern Cooperative Oncology Group performance status; EN, extranodal; B2M, beta 2 microglobulin.

\*no death in patients with normal LDH.
